# Supplementary material for: Energy landscape quantifications of histone H3.3 recognition by chaperone DAXX reveal an uncoupled binding specificity and affinity
Source: Royal Society of Chemistry journal article supplement (doi:10.1039/d3cp02612d), 2023-01-01
Supplement: d3cp02612d1.pdf [file d3cp02612d1.pdf]

## Electronic Supplementary Information

# Energy landscape quantifications of histone H3.3 recognition by chaperon DAXX reveal an uncoupled binding specificity and affinity

Fei Liu<sup>1, 2</sup>, Jin Wang<sup>3, \*</sup>, Rui-Ming Xu<sup>4, 5, \*</sup>, Na Yang<sup>1, \*</sup>

1. State Key Laboratory of Medicinal Chemical Biology, College of Pharmacy and Key Laboratory of Medical Data Analysis and Statistical Research of Tianjin, Nankai University, 300353

2. Wenzhou Institute, University of Chinese Academy of Sciences, Wenzhou, Zhejiang, 325001, China.

3. Department of Physics and Astronomy, State University of New York at Stony Brook, Stony Brook NY 11794, USA

4. National Laboratory of Biomacromolecules, CAS Center for Excellence in Biomacromolecules, Institute of Biophysics, Chinese Academy of Sciences, Beijing 100101, China

5. School of Life Sciences, University of Chinese Academy of Sciences, Beijing 100049, China

\* To whom correspondence should be addressed. Email: jin.wang.1@stonybrook.edu, rmxu@ibp.ac.cn, yangnanku@nankai.edu.cn

## 1 Hamiltonian

The Hamiltonian is given by the expression:

$$U_{Total} = U_{Local} + U_{Attraction} + U_{Repulsive}$$

### 1.1 Attraction term

The  $U_{Attraction}$  is give by the expression:  $U_{Attraction} = U_{LJ}(nativecontacts)$

$$U_{LJ} = \epsilon_{LJ} [5(\frac{\sigma_{ij}}{r_0})^{12} - 6(\frac{\sigma_{ij}}{r_0})^{10}]$$

We build a native contacts library by collecting all the pairs in the contact map obtained from the reference crystal structures (PDB ID: 4HGA).

### 1.2 Repulsive interactions

The  $\sigma_{NC}$  is the excluded distance between non-native pairs to provide excluded volume repulsion. The repulsive rail is 4.0 Å, the  $\epsilon_{NC} = 1KJ/mol$ . All pairs in  $\gamma^{all}$  were not considered in this term.

$$U_{Repulsive} = \epsilon_{NC} (\frac{\sigma_{NC}}{r_{ij}})^{12}$$

### 1.3 Local Potential

The Local potential is divided into bond stretching, angle bending, torsion energy.

$$U_{Local} = U_{Bonds} + U_{Angles} + U_{Dihedrals}$$

$$U_{Bonds} = \sum_{bonds} K_b (r - r_0)^2 = 0$$

$$U_{Angles} + U_{Dihedral} = K_\theta (\theta - \theta_0)^2 + K_\phi [(1 - \cos(\phi - \phi_0)) + 0.5(1 - \cos(\phi - \phi_0))]$$

The bonded energies  $U_{Bonds}$  are summed over the energy of all co-valent bonds.  $K_r = 10000KJ/(mol\ nm^2)$  is the bond constant. The angle constant  $K_\theta = 20kJ/mol$ . The  $K_\phi = 0.8kJ/mol$ .

2 Supplementary Figure

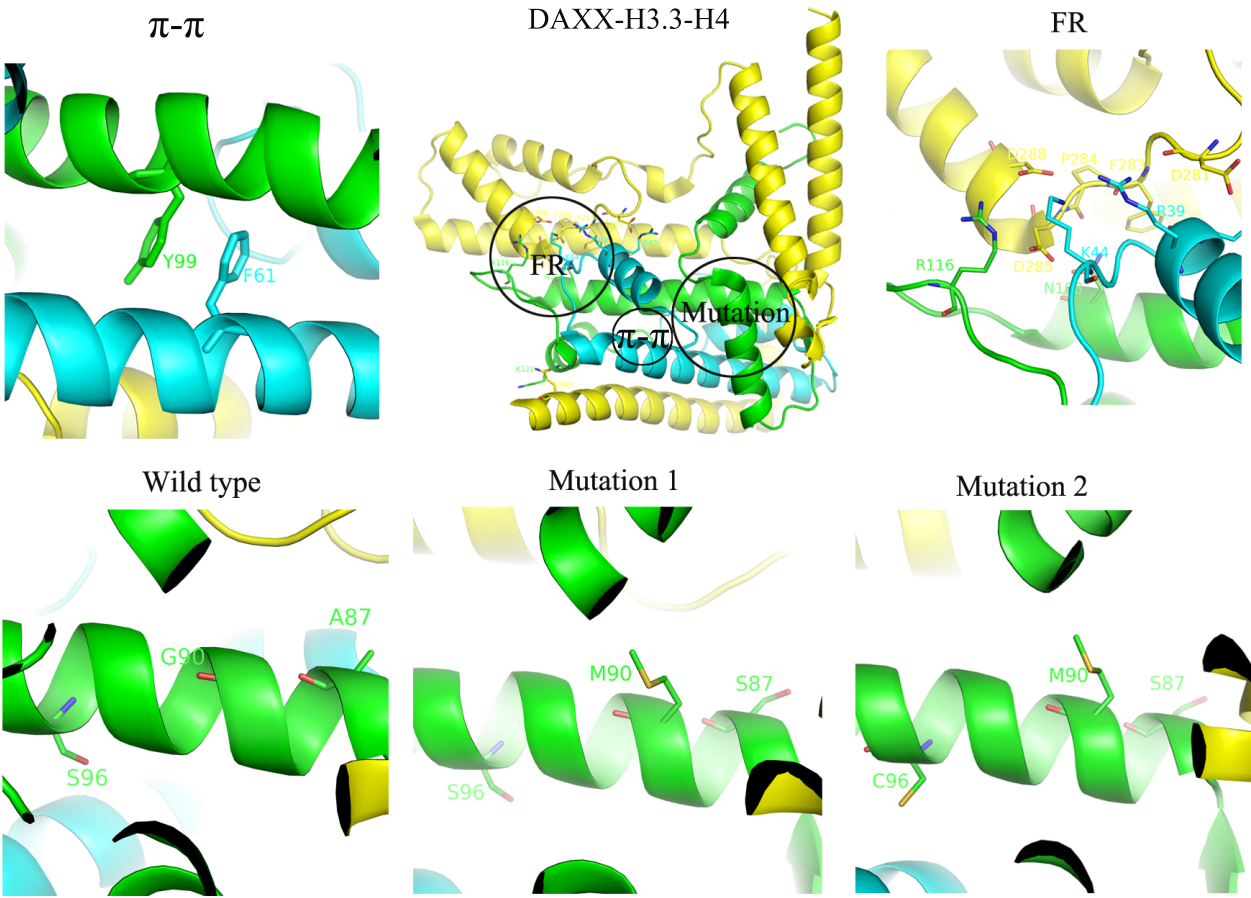

Figure S1. The pi-pi interaction region, folding region (FR) and AAMD with mutations.

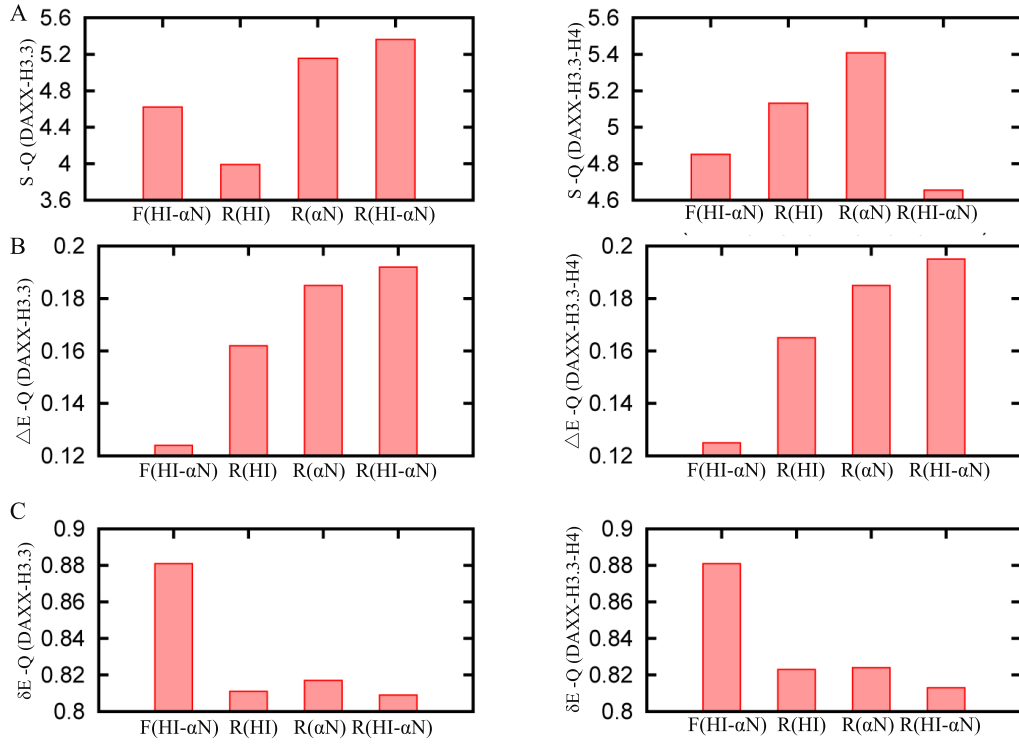

Figure S2. The phase transition temperature of binding is measured by the equation  $1/T_f = S/(E_n - E_D)$ , where the  $S$  is quantified by  $\ln(E_D)$ . The energy gap  $\delta E$  is quantified by  $E_n - E_D$  and the energy roughness  $\Delta E$  is got by calculating the standard deviation of non-native state ensemble. The  $A$  can be got by equation  $A = \delta E / (\Delta E \sqrt{2S})$ . The  $Q$  values between DAXX and H3.3 as well as between DAXX and H3.3-H4 complex are used to define the location of the native and nonnative basins within the density of states during the binding and binding-folding process of DAXX and H3.3-H4.

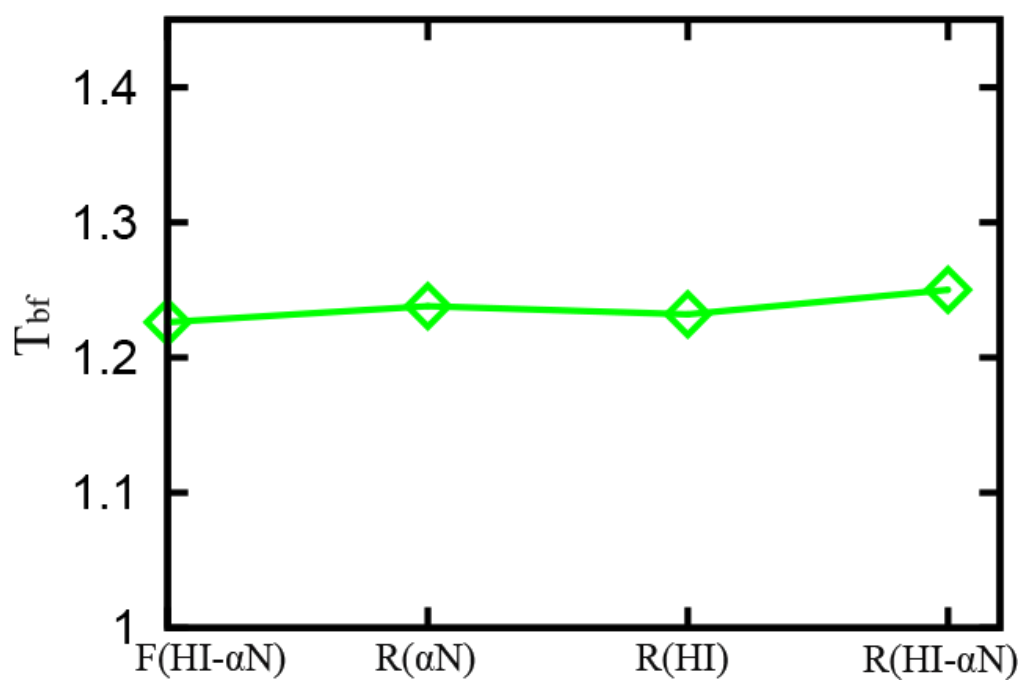

Figure S3. The phase transformation temperature  $T_{bf}$  of simulation in each local flexibility simulation.

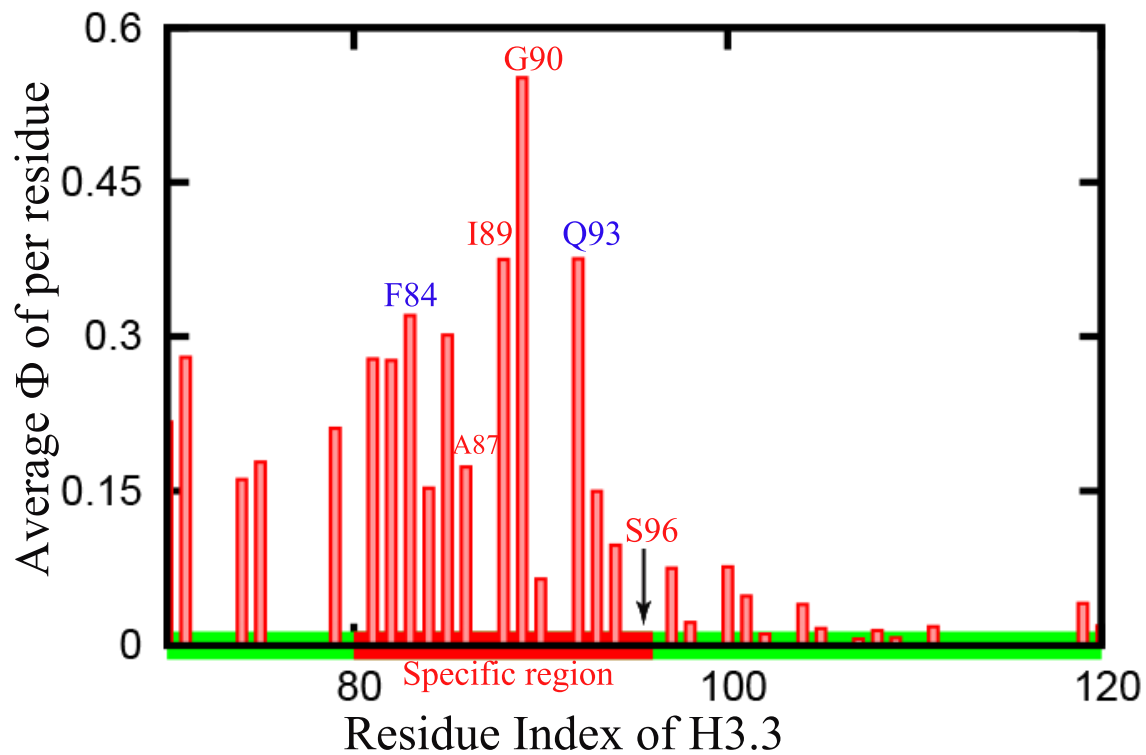

Figure S4. The average  $\Phi$  values of residues within the specific region at barrier height S2. When the average  $\Phi$  values increase, there is a corresponding augmentation in the positive contribution to each state.

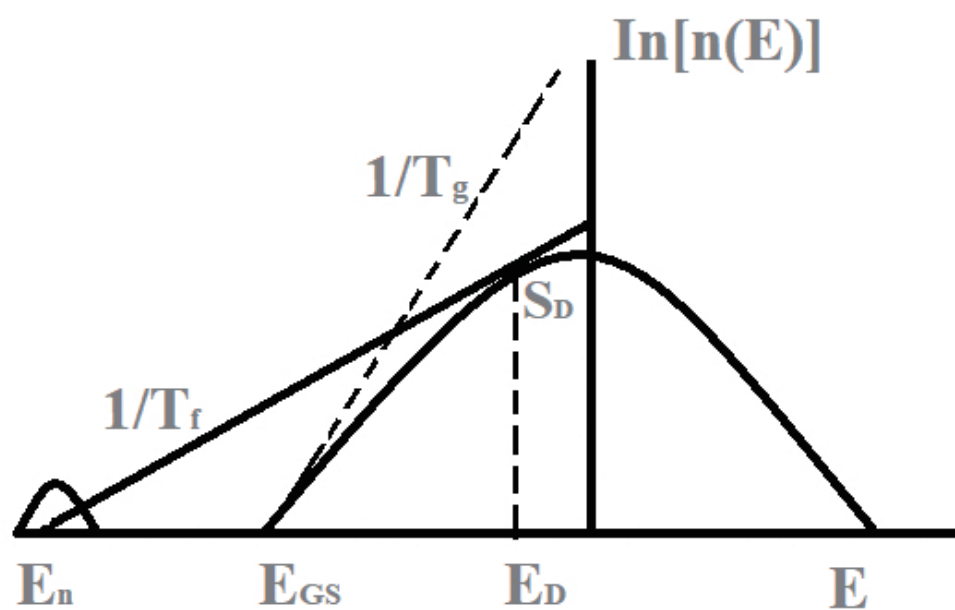

Figure S5. Quantify Intrinsic Energy Funnel.
